1 **Title:** Binucleated cells generated by nuclear movement during neural  
2 transdifferentiation from human bone marrow-derived mesenchymal cells

3

4 **Authors:** Carlos Bueno<sup>1,\*</sup>, Miguel Blanquer<sup>1</sup>, David García-Bernal<sup>1,2</sup>, Salvador  
5 Martínez<sup>3</sup> and José M. Moraleda<sup>1</sup>.

6

7 <sup>1</sup>Medicine Department and Hematopoietic Transplant and Cellular Therapy Unit,  
8 Institute of Biomedical Research (IMIB), University of Murcia, Faculty of Medicine,  
9 Murcia, 30120, Spain.

10 <sup>2</sup>Biochemistry, Molecular Biology and Immunology Department, University of  
11 Murcia, Faculty of Medicine, Murcia, 30100, Spain

12 <sup>3</sup>Instituto de Neurociencias de Alicante (UMH-CSIC), Universidad Miguel  
13 Hernandez, San Juan, Alicante, 03550, Spain.

14

15

16 \*Correspondence: Carlos Bueno, PhD., Medicine Department and Hematopoietic  
17 Transplant and Cellular Therapy Unit, Institute of Biomedical Research (IMIB),  
18 University of Murcia, Faculty of Medicine, Murcia, 30120, Spain. Tel.: 0034-  
19 968885013. Fax: 00-34-868884150. E-mail: carlos.bueno@um.es

20

21

22

## 23 **Summary**

24 Although it has been reported that bone marrow-derived mesenchymal stromal cells  
25 (BM-MSCs) can transdifferentiate into neural cells, the findings are considered  
26 unlikely. Cell changes induced by cytotoxicity and cell fusion events are alternative  
27 explanations for these observations in culture and transplantation studies, respectively.  
28 Here, we showed that BM-MSC neural transdifferentiation involves the formation of  
29 dedifferentiated cells which can then redifferentiate into neural-like cells, redifferentiate  
30 back to the mesenchymal fate or even repeatedly switch lineages without cell division.  
31 Furthermore, we have discovered that nuclei from dedifferentiated cells rapidly move  
32 within the cell, adopting different morphologies and even forming binucleated cells. We  
33 also noted that dedifferentiated cells position their nucleus at the front of the cell during  
34 migration. Our results demonstrated that BM-MSCs can rapidly transdifferentiate into  
35 neural-like cells and binucleated BM-MSCs can form with independence of any cell  
36 fusion events, suggesting that BM-MSC neural transdifferentiation is a fact, not an  
37 artifact.

38

## 39 **Highlights**

40 hBM-MSC neural transdifferentiation involves the formation of dedifferentiated cells.

41 hBM-MSCs could rapidly and repeatedly switch lineages without cell division.

42 Nuclei from hBM-MSCs rapidly move within the cell adopting different morphologies.

43 Binucleated hBM-MSCs can be formed with independence of any cell fusion events.

44

45

## 46 **Introduction**

47 We have known for many decades that adult cells can change their identity through  
48 dedifferentiation and transdifferentiation processes (Blau et al., 2001; Raff et al., 2003;  
49 Rajagopal et al., 2016). However, the cellular and molecular mechanisms that occur  
50 during these cell conversions are nuclear (Reid et al., 2018). It has been suggested that  
51 transdifferentiation may occur directly or it may involve a de-differentiation step before  
52 cells re-differentiation to a new mature phenotype. (Jopling et al., 2011; Merrell et al.,  
53 2016). Current research aims to understand the mechanisms of these these cell  
54 conversion processes and eventually harness them for use in regenerative medicine  
55 (Jopling et al., 2011; Eguizabal et al., 2013; Slack et al., 2007).

56 Several reports have indicated that mesenchymal stromal cells (MSCs) isolated from  
57 adult tissues can transdifferentiate into neural cells, both in vitro (Black et al., 2001;  
58 Woodbury et al., 2002; Muñoz-Elias et al., 2003; Jeong et al., 2004; Suon et al., 2004;  
59 Ning et al., 2016; Azedi et al., 2017; Radhakrishnan et al., 2019) and in vivo (Azizi et  
60 al., 1998; Kopen et al., 1999; Priller et al., 2001; Muñoz-Elias, G et al., 2004).  
61 However, the findings and their interpretation have been challenged (Krabbe et al.,  
62 2005; Kemp et al., 2014). The main argument against these observations in culture  
63 studies is that MSCs rapidly adopt neural-like morphologies through retraction of the  
64 cytoplasm, rather than by active neurite extension (Krabbe et al., 2005; Neuhuber et al.,  
65 2004; Lu et al., 2004). While transplantation studies have indicated that bone marrow-  
66 derived mesenchymal stromal cells (BM-MSCs) can contribute to the neuronal  
67 architecture of the nervous system, including Purkinje cells within the cerebellum  
68 (Azizi et al., 1998; Kopen et al., 1999; Priller et al., 2001; Muñoz-Elias, G., 2004.,  
69 Kemp et al., 2014), the possibility of BM-MSCs transdifferentiating into neural cells is  
70 considered unlikely, and the more accepted explanation that donor MSCs fuse with host

71 neurons (Kemp et al., 2014). Cell fusion has been put forward to explain the presence of  
72 gene-marked binucleated Purkinje neurons after gene-marked bone marrow-derived cell  
73 transplantation (Kemp et al., 2014; Alvarez-Dolado et al., 2003). We recently reported  
74 that MSCs isolated from adult human tissues (hMSCs) can transdifferentiate into  
75 neural-like cells without passing through a mitotic stage and that they shrank  
76 dramatically and changed their morphology to that of neural-like cells through active  
77 neurite extension (Bueno et al., 2019; Bueno et al., 2021). These findings demonstrated  
78 that the transdifferentiation of hMSCs towards a neural lineage involves a  
79 dedifferentiation event prior to re-differentiation to neural phenotypes, thus definitively  
80 confirming that the rapid acquisition of a neural-like morphology during hMSC  
81 transdifferentiation is via a transdifferentiation trait rather than merely an artefact.  
82 Furthermore, we noted that nuclear remodelling occurred during in vitro neural  
83 transdifferentiation from hMSCs. We discovered that many hMSCs exhibit unusual  
84 nuclear structures and even possess two nuclei.

85 In the present study, we examined the sequence of biological events during neural  
86 transdifferentiation of human BM-MSCs (hBM-MSCs) by live-cell nucleus  
87 fluorescence labelling and time-lapse microscopy to determine whether the binucleation  
88 events observed during neural transdifferentiation from hMSCs are due to cell division  
89 or cell fusion events.

90

## 91 **Results**

### 92 **Morphological changes in hBM-MSCs during neural transdifferentiation**

93 We examined the sequence of biological events during neural transdifferentiation of  
94 histone H2B-GFP transfected hBM-MSCs by time-lapse microscopy. Time-lapse

95 imaging revealed that, after neural induction, hBM-MSCs can rapidly reshape from a  
96 flat to a spherical morphology. Subsequently, we observed that hMSC-derived round  
97 cells can maintain the spherical shape (Figure 1, green arrows; Movie S1) or assume  
98 new morphologies; round cells can change to a morphology similar to that of neural-like  
99 cells through active neurite extension (Figure 1, red arrows; Movie S1) or they can  
100 revert back to the mesenchymal morphology (Figure 1, yellow arrows; Movie S1).

101 The hBM-MSCs did not transdifferentiate at the same time or rate, so the cell culture  
102 simultaneously contained hBM-MSCs at different stages of transdifferentiation.  
103 Importantly, there was no cell proliferation or cell fusion through transdifferentiation  
104 from hBM-MSCs (Figure 1; Movie S1). These results confirm our previous findings  
105 (Bueno et al., 2013; Bueno et al., 2019; Bueno et al., 2021) and lend further support to  
106 the notion that MSCs transdifferentiate towards a neural lineage through a  
107 dedifferentiation step followed by re-differentiation to neural phenotypes.

108 As noted above, hBM-MSC-derived round cells can even preserve their spherical  
109 morphology for days without assuming new fates. However, it is important to note that  
110 cellular protrusions appeared, moved and disappeared from the surface of hBM-MSC-  
111 derived round cells during this dedifferentiation stage (Figure 2; Movie S2).  
112 Contrastingly, we also found that hBM-MSC-derived round cells can adopt a neural-like  
113 morphology via active neurite extension. (Figure 3; Movie S3). New neurites grew from  
114 the body of some round cells, which gradually adopted a more complex morphology, by  
115 acquiring dendrite-like (Figure 3, green arrows) and axon-like domains (Figure 3,  
116 yellow arrows). We did not observe any cellular protrusions as hBM-MSC-derived  
117 round cells gradually acquired a neural-like morphology. Finally, hBM-MSC-derived  
118 round and neural-like cells could also re-differentiate back to the mesenchymal  
119 morphology (Figures 1-3; Movies S1-S3). Surprisingly, hBM-MSCs could also rapidly

120 and repeatedly switch lineages without cell division (Figure 4; Movie S4). This finding  
121 is consistent with a previous study that report Schwann cells can undergo multiple  
122 cycles of differentiation and dedifferentiation without entering the cell cycle (Monje et  
123 al., 2010).

#### 124 **Nuclear remodelling during neural transdifferentiation from hBM-MSCs**

125 Live-cell nucleus fluorescence labelling and time-lapse microscopy revealed that  
126 nuclear remodelling occurred during neural transdifferentiation from hBM-MSCs.  
127 Nuclei from histone H2B-GFP-expressing, hBM-MSC-derived round cells moved  
128 within the cell, adopting different morphologies and positions, and even forming lobed  
129 nuclei (Figure 5; Movie S5). Although the cell nuclei switched their morphologies while  
130 moving, the nuclear movement primarily produces three different nuclear morphologies  
131 and positions. Firstly, the cell nucleus acquired a finger-like shape and moves within the  
132 cell, generating the cellular protrusions that appeared and disappeared from the surface  
133 of hBM-MSC-derived round cells (Figure 6; Movie S6). Secondly, the nucleus acquired  
134 a finger-like shape, before reorienting towards a peripheral position within the cell and  
135 acquiring a kidney-like shape. Subsequently, the cell nucleus began to move rapidly  
136 around the cell (Figure S1; Movie S7). And thirdly, the nucleus acquired a finger-like  
137 shape and moved within the cell to form lobed nuclei connected by nucleoplasmic  
138 bridges. The lobed nuclei movement also generated transient cellular protrusions on the  
139 surface of hBM-MSC-derived round cells (Figure 7; Movie S8).

140 It is important to note that histone H2B-GFP-expressing, hBM-MSC-derived round  
141 cells position their nucleus at the front of the cell during migration (Figure S2; Movies  
142 S9 and S10). This nuclear positioning was observed in mononucleated hBM-MSC-  
143 derived round cells, in both cells with kidney shaped nuclei (Figure S2A; Movie S9)  
144 and cells with finger shaped nuclei (Figure S2B; Movie S10). hBM-MSC-derived round

145 cells with lobed nuclei also positioned their nucleus at the front of the cell during  
146 migration (Figure S3A; Movie S11). Furthermore, we observed that hBM-MSC-derived  
147 round cells with lobed nuclei positioned their largest lobe at the front of the cell during  
148 migration (Figure S3B; Movie S12). These findings are consistent with a previous study  
149 that reported that human leukocytes position their nucleus at the front of the cell during  
150 migration (Barzilai et al., 2010).

151 As mentioned previously, hBM-MSC-derived round cells can also assume new  
152 morphologies, gradually adopting a neural-like morphology through active neurite  
153 extension or re-differentiating back to their mesenchymal morphology. There were no  
154 changes in nuclear positioning or lobed nuclei formation as histone H2B-GFP-  
155 expressing, hBM-MSC-derived round cells gradually acquired a neural-like morphology  
156 (Figure S4; Movie S13). By contrast, when histone H2B-GFP-expressing, hBM-MSC-  
157 derived round cells reverted back to the mesenchymal morphology, the nuclei from  
158 mononucleated round cells gradually adopted their original ellipsoid shape (Figure S5A;  
159 Movie S14). Yet when round cells with lobed nuclei reverted back to the mesenchymal  
160 morphology, the lobed nuclei preserved their shape for hours (Figure S5B; Movie S15).  
161 In future studies, live-cell nucleus fluorescence labelling and time-lapse microscopy  
162 over longer periods is necessary to determine whether the lobed nuclei finally fused to  
163 form a single nucleus.

164 Finally, laser scanning confocal microscopy revealed that many histone H2B-GFP-  
165 expressing, hBM-MSC-derived round cells with unusual nuclear structures also  
166 exhibited extranuclear chromatin-containing bodies in the cellular cytoplasm during  
167 neural transdifferentiation (Figure S6). We observed that hBM-MSCs with finger  
168 shaped nuclei (Figure S6A), kidney shaped nuclei (Figure S6B) and lobed nuclei  
169 connected by nucleoplasmic bridges (Figure S6C) can also exhibit extranuclear bodies

170 in the cellular cytoplasm. Furthermore, we found chromatin-containing bodies  
171 connected to the main body of the nucleus by thin strands of nuclear material (Figure  
172 S6D), chromatin-containing bodies moving away from or toward the main nuclei  
173 (Figure S6E) and two lobed nuclei unconnected by any nucleoplasmic bridges with  
174 chromatin-containing bodies in the cellular cytoplasm (Figure S6F). These results  
175 indicate that binucleated hBM-MSCs form during neural transdifferentiation with  
176 independence of any cell division or fusion events.

177 Importantly, the nuclear morphology of hBM-MSCs observed during the  
178 transdifferentiation bears a lot of similarities to the nuclear morphology of neural stem  
179 cells located in the ventricular-subventricular zone of the anterolateral ventricle wall of  
180 the human foetal brain (Guerrero-Cázares et al., 2011) and adult mouse brain (Doetsch  
181 et al., 1997; Capilla-Gonzalez et al., 2014; Cebrián-Silla et al., 2017); their nuclear  
182 morphology is also very similar to that of many cultured hippocampal neurons  
183 (Wittmann et al., 2009). For example, the nuclear morphologies in Figure S6C are very  
184 similar to those observed in Wittmann et al. (2019, Fig. S2), Cebrián-Silla et al. (2017,  
185 Figs. 1E, 4I, 6F, S1B, S2B and S6A), Guerrero-Cázares et al. (2011, Fig. 2C) and  
186 Doetsch et al. (1997, Fig. 3A). Furthermore, the nuclear morphologies shown in Figure  
187 S6D closely resemble those reported by Cebrián-Silla et al. (2017, Figs. 1A,1B,1M,1N,  
188 3I, 6A, 6B and 6H) and Guerrero-Cázares et al (2011, Fig. 3j). In addition, the nuclear  
189 morphologies in Figure S6E are very similar to those observed in Capilla-Gonzalez et  
190 al. (2014, Fig. S2C).

## 191 **Discussion**

192 In this study, we have shown that when hBM-MSCs were exposed to a neural induction  
193 medium, they rapidly reshaped from a flat to a spherical morphology. Subsequently,



194 hBM-MSC-derived round cells could preserve this the spherical morphology or assume  
195 new ones; they gradually adopted a neural-like morphology through active neurite  
196 extension or re-differentiated back to the mesenchymal fate. Furthermore, we found that  
197 hBM-MSCs can rapidly and repeatedly switch lineages without cell division. These  
198 results confirm our previous findings (Bueno et al., 2013; Bueno et al., 2019; Bueno et  
199 al., 2021) and further support the concept that transdifferentiation of MSCs towards a  
200 neural lineage occurs through a dedifferentiation step followed by re-differentiation to  
201 neural phenotypes.

202 This work also highlights that nuclear remodelling occurred during in vitro neural  
203 transdifferentiation from hMSCs. We discovered that nuclei in dedifferentiated cells  
204 rapidly moved within the cell, adopting different morphologies and even forming lobed  
205 nuclei. These nuclear movements generated transient cellular protrusions that appeared  
206 and disappeared from the surface of hBM-MSC-derived round cells. The  
207 dedifferentiated cells positioned their nucleus at the front of the cell during migration.  
208 These findings may suggest that nuclei in dedifferentiated cells are somehow sensing  
209 their surroundings. Future research is required to determine the feasibility of this  
210 conjecture.

211 This study not only shows that the main nuclei move within the cell, changing their  
212 morphology and position, but also that there are different sized chromatin-containing  
213 extranuclear bodies within cell cytoplasm. Therefore, it would be interesting to examine  
214 whether chromatin-containing bodies can move independently of the movement of the  
215 main nuclei or if they are a product of the main nuclei movement. In previous  
216 publications (Bueno et al., 2019; Bueno et al., 2021), we suggested that nuclear  
217 remodelling sequence might occur during neural transdifferentiation from hMSCs.  
218 Nevertheless, with new data, we have realised that this hypothesis was wrong because,

219 among other factors, it seems that not all hBM-MSCs form lobed nuclei during neural  
220 transdifferentiation. Future research is necessary to determine how nuclear remodelling  
221 occurs.

222 The literature published in recent decades has shown that MSCs isolated from adult  
223 tissues can form new neurons, both in culture (Black et al., 2001; Woodbury et al.,  
224 2002; Muñoz-Elias et al., 2003; Jeong et al., 2004; Suon et al., 2004; Ning et al., 2016;  
225 Azedi et al., 2017; Radhakrishnan et al., 2019) and transplantation studies (Azizi et al.,  
226 1998; Kopen et al., 1999; Priller et al., 2001; Muñoz-Elias, G et al., 2004). However,  
227 the findings and their interpretations have been challenged (Krabbe et al., 2005; Kemp  
228 et al., 2014). It has been argued that the rapid neural transdifferentiation of MSCs  
229 reported in culture studies is actually due to cytotoxic changes induced by the media  
230 (Krabbe et al., 2005; Neuhuber et al., 2004; Lu et al., 2004), so the rapid changes should  
231 not be interpreted as signs of transdifferentiation. While transplantation studies  
232 indicated that BM-MSCs can contribute to the neuronal architecture of the central  
233 nervous system, including that of Purkinje cells within the cerebellum (Azizi et al.,  
234 1998; Kopen et al., 1999; Priller et al., 2001; Muñoz-Elias, et al., 2004., Kemp et al.,  
235 2014), it remains unclear whether the underlying mechanism is transdifferentiation or  
236 BM-MSc-derived cell fusion with the existing neuronal cells, or both (Kemp et al.,  
237 2014). Cell fusion has been put forward to explain the presence of gene-marked  
238 binucleated Purkinje neurons after gene-marked bone marrow-derived cell  
239 transplantation (Kemp et al., 2014; Alvarez-Dolado et al., 2003). In this study, we have  
240 shown that BM-MSCs can rapidly adopt a neural-like morphology through active  
241 neurite extension. Furthermore, we demonstrated that binucleated hBM-MSCs can be  
242 formed during neuronal transdifferentiation with independence of any cell fusion

243 events. Therefore, our results provide further evidence that MSCs isolated from adult  
244 tissues can overcome their mesenchymal fate and transdifferentiate into neural cells.

245 Importantly, the nuclear morphology of hBM-MSCs observed during the  
246 transdifferentiation bears a lot of similarities to the nuclear morphology of neural stem  
247 cells located in the ventricular-subventricular zone of the anterolateral ventricle wall of  
248 the human foetal brain (Guerrero-Cázares et al., 2011) and adult mouse brain (Doetsch  
249 et al., 1997; Capilla-Gonzalez et al., 2014; Cebrián-Silla et al., 2017); their nuclear  
250 morphology is also very similar to that of many cultured hippocampal neurons  
251 (Wittmann et al., 2009). Although it has generally been believed that adult neurogenesis  
252 occurs progressively through sequential phases of proliferation and neuronal  
253 differentiation of adult stem cells (Bond et al., 2015), the approaches used to probe stem  
254 cell division and differentiation, and even direct lineage tracing, are inherently limited  
255 (Rakic et al., 2002; Cooper-Kuhn et al., 2002; Breunig et al., 2007; Kuhn et al., 2016;  
256 Sorrells et al., 2021). What is more, many authors have reported binucleated neurons in  
257 various central and peripheral parts of the nervous system including, the hippocampus  
258 (Altman et al., 1963), cerebellum (Magrassi et al., 2007; Das et al., 1977), sympathetic  
259 and spinal ganglia (Das et al., 1977), cerebral cortex (Das et al., 1977) and spinal cord  
260 (Das et al., 1977). Collectively, these findings suggest that new neurons can also be  
261 generated without necessitating cell division. Future research is required to determine  
262 the likelihood of this premise.

263 In conclusion, our results indicate that BM-MSC neural transdifferentiation is a fact and  
264 not an artifact. Therefore, hMSCs can be used to understand how cellular conversion  
265 processes work (Reid et al., 2018; Jopling et al., 2011; Merrell et al., 2016) and to  
266 eventually harness them for use in the treatment of neurological disorders (Choudhary et  
267 al., 2021).

268

## 269 **Experimental procedures**

### 270 **Ethical conduct of research**

271 The authors declare that all protocols used to obtain and process all human samples  
272 were approved by the local ethics committees (UMH.IN.SM.03.16,  
273 HULP3617.05/07/2012 and HUSA19/1531.17/02/2020) according to Spanish and  
274 European legislation and conformed to the ethical guidelines of the Helsinki  
275 Declaration. Donors provided written informed consent before obtaining samples.

### 276 **Isolation and culture of hBMSCs**

277 Bone marrow aspirates were obtained by percutaneous direct aspiration from the iliac  
278 crest of 5 healthy volunteers at University Hospital Virgen de la Arrixaca (Murcia,  
279 Spain). Bone marrow was collected with 20 U/ml sodium heparin, followed by a Ficoll  
280 density gradient-based separation by centrifugation at 540g for 20 min. After,  
281 mononuclear cell fraction was collected, washed twice with  $\text{Ca}^{2+}/\text{Mg}^{2+}$ -free phosphate  
282 buffered saline (PBS) (Gibco Invitrogen) and seeded into 175-cm<sup>2</sup> culture flasks (Nunc,  
283 Thermo Fisher Scientific) at a cell density  $1.5 \times 10^5$  cells/cm<sup>2</sup> in serum-containing media  
284 (designated as the basal media), composed of DMEM low glucose medium (Thermo  
285 Fisher Scientific) supplemented with 10% fetal bovine serum (FBS; Lonza), 1%  
286 GlutaMAX (Thermo Fisher Scientific), non-essential amino acid solution (Sigma-  
287 Aldrich) and 1% penicillin/streptomycin (Thermo Fisher Scientific). After 3 days of  
288 culture at 37°C and 7% CO<sub>2</sub>, non-attached cells were removed and fresh complete  
289 medium was added. Culture media were renewed every 2 days, and the isolated  
290 hBMSCs were passaged when cultures were 70-80% confluent. All studies were  
291 performed using hBMSCs expanded within culture passages 3-4.

## 292 **Expression Vectors and Cell Transfection**

293 The expression vectors used in the present study were H2B-eGFP, a gift from Geoff  
294 Wahl (Addgene plasmid # 11680; <http://n2t.net/addgene:11680>; RRID:Addgene\_11680;  
295 Kanda et al., 1998). Isolated hBMSCs-derived cells were transfected using the Gene  
296 Pulser-II Electroporation System (Bio-Rad Laboratories). Electroporation was  
297 performed in a sterile cuvette with a 0.4-cm electrode gap (Bio-Rad Laboratories), using  
298 a single pulse of 270 V, 500  $\mu$ F. Plasmid DNA (5  $\mu$ g) was added to  $1.5 \times 10^6$  viable  
299 hBMSCs-derived cells in 0.2-ml DMEM low glucose medium (Thermo Fisher  
300 Scientific) before electrical pulsing.

## 301 **Time-lapse microscopy of histone H2B-GFP expressing hBM-MSCs cultured in** 302 **neural induction media**

303 We used  $\mu$ -Dish 35 mm, high Grid- 500 (Ibidi) for live cell imaging. Histone H2B-GFP  
304 transfected hBM-MSCs were plated onto collagen IV (Sigma-Aldrich) coated plastic or  
305 glass coverslips. To induce neural differentiation, cells at passage 3–4 were allowed to  
306 adhere to the plates overnight. Basal media was removed the following day and the cells  
307 were cultured for 2 days in serum-free media (designated as the neural basal media)  
308 consisting in Dulbecco's modified Eagle's medium/F12 (DMEM/F12 Glutamax, Gibco)  
309 supplemented with N2-supplement (R&D systems), 0.6% glucose (Sigma-Aldrich),  
310 5mM HEPES (Sigma-Aldrich), 0.5% human serum albumin (Sigma-Aldrich), 0.0002%  
311 heparin (Sigma-Aldrich), non-essential amino acid solution (Sigma-Aldrich) and 100  
312 U/ml penicillin-streptomycin (Sigma-Aldrich). On day 3, cells were cultured in neural  
313 induction media, consisting in the neural basal media supplemented with 500nM  
314 retinoic acid (Sigma-Aldrich), 1mM dibutyryl cAMP (Sigma-Aldrich) and the growth  
315 factors BDNF (10 $\square$ ng/ml; Peprotech), GDNF (10 $\square$ ng/ml; Peprotech) and IGF-1  
316 (10 $\square$ ng/ml; R&D systems). Time-lapse analysis was carried out using a Widefield

317 Leica Thunder-TIRF imager microscope. We perform time-lapse microscopy within the  
318 first 71 hr after neural induction media was added directly to the cells. Time-lapse  
319 images were obtained every 30 min. During imaging, cells were enclosed in a chamber  
320 maintained at 37°C under a humidified atmosphere of 5% CO<sub>2</sub> in air. Data are  
321 representative of ten independent experiments.

322

### 323 **Immunocytochemistry**

324 A standard immunocytochemical protocol was used as previously described (Bueno et  
325 al., 2013; Bueno et al., 2019; Bueno et al., 2021). Histone H2B-GFP transfected hBM-  
326 MSCs were plated onto collagen IV (Sigma-Aldrich) coated plastic or glass coverslips  
327 and maintained in neural induction media. Cells were rinsed with PBS and fixed in  
328 freshly prepared 4% paraformaldehyde (PFA; Sigma-Aldrich). Fixed cells were blocked  
329 for 2 h in PBS containing 10% normal horse serum (Gibco) and 0.25% Triton X-100  
330 (Sigma) and incubated overnight at 4 °C with antibodies against  $\beta$ -III-tubulin (TUJ1;  
331 1:500, Covance) in PBS containing 1% normal horse serum and 0.25% Triton X-100.  
332 On the next day, cells were rinsed and incubated with the secondary antibody  
333 conjugated with Alexa Fluor® 594 (anti-mouse; 1:500, Molecular Probes). Cell nuclei  
334 were counterstained with DAPI (0.2 mg/ml in PBS, Molecular Probes).

### 335 **Images and Data Analyses**

336 Photograph of visible and fluorescent stained samples were carried out in a Widefield  
337 Leica Thunder-TIRF imager microscope equipped with a digital camera or in confocal  
338 laser scanning microscope Leica TCS-SP8. We used Filmora Video Editor software for  
339 video editing and Photoshop software to improve the visibility of fluorescence images  
340 without altering the underlying data.

341

342 **Acknowledgements:** We greatly appreciate the technical assistance of Microscopy  
343 Section and the Tissue Culture Service of the University of Murcia.

344 **Author contributions:** C.B. conceived of the study, designed the study, carried out the  
345 molecular lab work and drafted the manuscript; M.B. and D.G-B. designed experiments,  
346 participated in data analysis and helped draft the manuscript; S.M. and J.M.M. helped  
347 draft the manuscript and financial support.

348 **Declaration of interests:** The authors declare no competing interests.

349 **Funding:** This study was supported by the Spanish Ministry of Science and Innovation,  
350 the Carlos III Health Institute (ISCIII), through the Spanish Network of Cell Therapy  
351 (TerCel), RETICS subprogram, projects RD16/0011/0001 and RD16/0011/0010, co-  
352 funded by European Regional Development Fund (ERDF) “Una manera de hacer  
353 Europa”. It was also partially supported by MINECO/AEI/ERDF, EU, Spanish Ministry  
354 of Economy, Industry and Competitiveness, the Spanish State Research Agency and the  
355 European Union through the ERDF– “Una manera de hacer Europa” (project  
356 SAF2017-83702-R); The Generalitat Valenciana (Prometeo/2018/041); Research Grant  
357 of the Universidad Católica San Antonio de Murcia (UCAM).

## 358 **References**

359 Alvarez-Dolado, M., Pardal, R., Garcia-Verdugo, J.M., Fike, J.R., Lee, H.O., Pfeffer,  
360 K., Lois, C., Morrison, S.J., and Alvarez-Buylla, A. (2003). Fusion of bone-marrow-  
361 derived cells with Purkinje neurons, cardiomyocytes and hepatocytes. *Nature* 425, 968-  
362 973. [10.1038/nature02069](https://doi.org/10.1038/nature02069).

363 Altman, J. (1963). Autoradiographic investigation of cell proliferation in the brains of  
364 rats and cats. *Anat. Rec.* *145*, 573-591. 10.1002/ar.1091450409.

365 Azedi, F., Kazemnejad, S., Zarnani, A.H., Soleimani, M., Shojaei, A., and Arasteh, S.  
366 (2017). Comparative capability of menstrual blood versus bone marrow derived stem  
367 cells in neural differentiation. *Mol. Biol. Rep.* *44*, 169–182. 10.1007/s11033-016-4095-  
368 7.

369 Azizi, A.S., Stokes, D., Augelli, B.J., DiGirolamo, C., and Prockop, D.J. (1998).  
370 Engraftment and migration of human bone marrow stromal cells implanted in the brains  
371 of albino rats – similarities to astrocyte grafts. *Proc. Natl. Acad. Sci. U S A* *95*, 3908-  
372 3913. 10.1073/pnas.95.7.3908.

373 Barzilai, S., Yadav, S.K., Morrell, S., Roncato, F., Klein, E., Stoler-Barak, L., Golani,  
374 O., Feigelson, S.W., Zemel, A., Nourshargh, S., et al. (2017). Leukocytes Breach  
375 Endothelial Barriers by Insertion of Nuclear Lobes and Disassembly of Endothelial  
376 Actin Filaments. *Cell Rep.* *18*, 685-699. 10.1016/j.celrep.2016.12.076.

377 Black, I.B., and Woodbury, D. (2001). Adult rat and human bone marrow stromal stem  
378 cells differentiate into neurons. *Blood Cells Mol. Dis.* *27*, 632-636.  
379 10.1006/bcmd.2001.0423.

380 Blau, H.M., Brazelton, T.H., and Weimann, J.M. (2001). The evolving concept of a  
381 stem cell: entity or function? *Cell* *105*, 829-841. 10.1016/s0092-8674(01)00409-3.

382 Bond, A. M., Ming, G.L., and Song, H. (2015). Adult mammalian neural stem cells and  
383 neurogenesis: five decades later. *Cell Stem Cell* *17*, 385–395.  
384 10.1016/j.stem.2015.09.003.



385 Breunig, J.J., Arellano, J.I., Macklis, J.D., and Rakic, P. (2007). Everything that glitters  
386 isn't gold: a critical review of postnatal neural precursor analyses. *Cell Stem Cell* 1,  
387 612–627. [10.1016/j.stem.2007.11.008](https://doi.org/10.1016/j.stem.2007.11.008).

388 Bueno, C., Ramirez, C., Rodríguez-Lozano, F.J, Tabarés-Seisdedos, R., Rodenas, M.,  
389 Moraleda, J.M., Jones, J.R., and Martinez, S. (2013). Human adult periodontal  
390 ligament-derived cells integrate and differentiate after implantation into the adult  
391 mammalian brain. *Cell Transplant.* 22, 2017–2028. [10.3727/096368912X657305](https://doi.org/10.3727/096368912X657305).

392 Bueno, C., Martínez-Morga, M., and Martínez, S. (2019). Non-proliferative  
393 neurogenesis in human periodontal ligament stem cells. *Sci. Rep.* 9, 18038.  
394 [10.1038/s41598-019-54745-3](https://doi.org/10.1038/s41598-019-54745-3).

395 Bueno, C., Martínez-Morga, M., García-Bernal, D., Moraleda, J.M., and Martínez, S.  
396 (2021). Differentiation of human adult-derived stem cells towards a neural lineage  
397 involves a dedifferentiation event prior to differentiation to neural phenotypes. *Sci Rep.*  
398 11, 12034. [10.1038/s41598-021-91566-9](https://doi.org/10.1038/s41598-021-91566-9).

399 Capilla-Gonzalez, V., Cebrian-Silla, A., Guerrero-Cazares, H., Garcia-Verdugo, J.M.  
400 and Quiñones-Hinojosa, A. (2014). Age-related changes in astrocytic and ependymal  
401 cells of the subventricular zone. *Glia* 62, 790–803. [10.1002/glia.22642](https://doi.org/10.1002/glia.22642).

402 Cebrián-Silla, A., Alfaro-Cervelló, C., Herranz-Pérez, V., Kaneko, N., Park, D.H,  
403 Sawamoto, K., Alvarez-Buylla, A., Lim, D.A., and García-Verdugo, J.M. (2017).  
404 Unique organization of the nuclear envelope in the post-natal quiescent neural stem  
405 cells. *Stem Cell Reports* 9, 203–216. [10.1016/j.stemcr.2017.05.024](https://doi.org/10.1016/j.stemcr.2017.05.024).

406 Choudhary, P., Gupta, A., and Singh, S. (2021). Therapeutic Advancement in Neuronal  
407 Transdifferentiation of Mesenchymal Stromal Cells for Neurological Disorders. *J. Mol.*  
408 *Neurosci.* 7, 889-901. [10.1007/s12031-020-01714-5](https://doi.org/10.1007/s12031-020-01714-5).

409 Cooper-Kuhn, C.M., and Kuhn, H.G. Is it all DNA repair? (2002). Methodological  
410 considerations for detecting neurogenesis in the adult brain. *Brain Res. Dev* 134, 13–21.  
411 0.1016/s0165-3806(01)00243-7.

412 Das, G.D. (1977). Binucleated neurons in the central nervous system of the laboratory  
413 animals. *Experientia* 33, 1179-80. 10.1007/BF01922313.

414 Doetsch, F., Garcia-verdugo, J.M., and Alvarez-buylla, A. (1997). Cellular composition  
415 and three-dimensional organization of the subventricular germinal zone in the adult  
416 mammalian brain. *J. Neurosci.* 17, 5046–5061. 10.1523/JNEUROSCI.17-13-  
417 05046.1997.

418 Eguizabal, C., Montserrat, N., Veiga, A., and Izpisua Belmonte J.C. (2013).  
419 Dedifferentiation, transdifferentiation, and reprogramming: future directions in  
420 regenerative medicine. *Semin. Reprod. Med.* 31, 82-94. 10.1055/s-0032-1331802.

421 Guerrero-Cázares, H., Gonzalez-Perez, O., Soriano-Navarro, M., Zamora-Berridi, G.,  
422 García-Verdugo, J.M., and Quinoñes-Hinojosa, A. (2011). Cytoarchitecture of the  
423 lateral ganglionic eminence and rostral extension of the lateral ventricle in the human  
424 fetal brain. *J. Comp. Neurol.* 519, 1165–1180. 10.1002/cne.22566.

425 Jeong, J.A., Gang, E.J., Hong, S.H., Hwang, S.H., Kim, S.W., Yang, I.H., Ahn, C.,  
426 Han, H., and Kim, H. (2004). Rapid neural differentiation of human cord blood-derived  
427 mesenchymal stem cells. *Neuroreport* 15, 1731–1734.  
428 10.1097/01.wnr.0000134846.79002.5c.

429 Jopling, C., Boue, S., and Izpisua Belmonte J.C. (2011). Dedifferentiation,  
430 transdifferentiation and reprogramming: three routes to regeneration. *Nat. Rev. Mol.*  
431 *Cell Biol.* 12, 79-89. 10.1038/nrm3043.

432 Kanda, T., Sullivan, K.F., and Wahl, G.M. (1998). Histone-GFP fusion protein enables  
433 sensitive analysis of chromosome dynamics in living mammalian cells. *Curr. Biol.* *8*,  
434 377-385. [10.1016/s0960-9822\(98\)70156-3](https://doi.org/10.1016/s0960-9822(98)70156-3).

435 Kemp, K., Wilkins, A., and Scolding, N. (2014). Cell fusion in the brain: two cells  
436 forward, one cell back. *Acta Neuropathol.* *128*, 629-38. [10.1007/s00401-014-1303-1](https://doi.org/10.1007/s00401-014-1303-1).

437 Kopen, G.C., Prockop, D.J., and Phinney, D.G. (1999). Marrow stromal cells migrate  
438 throughout forebrain and cerebellum, and they differentiate into astrocytes after  
439 injection into neonatal mouse brains. *Proc. Natl. Acad. Sci. USA* *96*, 10711–10716.  
440 [10.1073/pnas.96.19.10711](https://doi.org/10.1073/pnas.96.19.10711).

441 Kuhn, H.G., Eisch, A.J., Spalding, K., and Peterson, D.A. (2016). Detection and  
442 Phenotypic Characterization of Adult. Neurogenesis. *Cold Spring Harb. Perspect. Biol.*  
443 *8*, a025981. [10.1101/cshperspect.a025981](https://doi.org/10.1101/cshperspect.a025981).

444 Krabbe, C., Zimmer, J., and Meyer, M. (2005). Neural transdifferentiation of  
445 mesenchymal stem cells - a critical review. *APMIS* *113*, 831–844. [10.1111/j.1600-0463.2005.apm\\_3061.x](https://doi.org/10.1111/j.1600-0463.2005.apm_3061.x).

447 Lu, P., Blesch, A., and Tuszynski, M.H. (2004). Induction of bone marrow stromal cells  
448 to neurons: differentiation, transdifferentiation, or artifact? *J. Neurosci. Res.* *77*, 174-  
449 191. [10.1002/jnr.20148](https://doi.org/10.1002/jnr.20148).

450 Magrassi, L., Grimaldi, P., Ibatici A., Corselli, M., Ciardelli, L., Castello, S., Podestà,  
451 M., Frassoni, F., and Rossi, F. (2007). Induction and survival of binucleated Purkinje  
452 neurons by selective damage and aging. *J. Neurosci.* *27*, 9885-9892.  
453 [10.1523/JNEUROSCI.2539-07.2007](https://doi.org/10.1523/JNEUROSCI.2539-07.2007).

- 454 Merrell, A.J., and Stanger, B.Z. (2016). Adult cell plasticity in vivo: de-differentiation  
455 and transdifferentiation are back in style. *Nat. Rev. Mol. Cell Biol.* *17*, 413-25.  
456 10.1038/nrm.2016.24.
- 457 Monje, P.V., Soto, J., Bacallao, K., and Wood, P.M. (2010). Schwann cell  
458 dedifferentiation is independent of mitogenic signaling and uncoupled to proliferation:  
459 role of cAMP and JNK in the maintenance of the differentiated state. *J. Biol. Chem.*  
460 *285*, 31024-31036. 10.1074/jbc.M110.116970.
- 461 Muñoz-Elias, G., Marcus, A.J., Coyne, T.M., Woodbury, D., and Black, I.B. (2004).  
462 Adult bone marrow stromal cells in the embryonic brain: engraftment, migration,  
463 differentiation, differentiation, and long-term survival. *J. Neurosci.* *24*, 4585-4595.  
464 10.1523/JNEUROSCI.5060-03.2004.
- 465 Muñoz-Elias, G., Woodbury, D., and Black, I.B. (2003). Marrow stromal cells, mitosis  
466 and neuronal differentiation: stem cell and precursor functions. *Stem Cells* *21*, 437-448.  
467 10.1634/stemcells.21-4-437.
- 468 Neuhuber, B., Gallo, G., Howard, L., Kostura, L., Mackay, A., and Fischer, I. (2004).  
469 Reevaluation of in vitro differentiation protocols for bone marrow stromal cells:  
470 disruption of actin cytoskeleton induces rapid morphological changes and mimics  
471 neuronal phenotype. *J. Neurosci. Res.* *77*, 192-204. 10.1002/jnr.20147.
- 472 Ning, H., Lin, G., Lue, T.F., and Lin, C.S. (2016). Neuron-like differentiation of adipose  
473 tissue-derived stromal cells and vascular smooth muscle cells. *Differentiation* *74*, 510-  
474 518. 10.1111/j.1432-0436.2006.00081.x.
- 475 Priller, J., Persons, D.A., Klett, F.F., Kempermann, G., Kreutzberg, G.W., and Dirnagl,  
476 U. (2001). Neogenesis of cerebellar Purkinje neurons from gene-marked bone marrow  
477 cells in vivo. *J. Cell Biol.* *155*, 733-738. 10.1083/jcb.200105103.

- 478 Radhakrishnan, S., Trentz, O.A., Reddy, M.S., Rela, M., Kandasamy, M., and  
479 Sellathamby, S. (2019). In vitro transdifferentiation of human adipose tissue-derived  
480 stem cells to neural lineage cells - a stage-specific incidence. *Adipocyte* 8, 164–177.  
481 10.1080/21623945.2019.1607424.
- 482 Raff, M. Adult stem cell plasticity: fact or artifact? (2003). *Annu. Rev. Cell Dev. Biol.*  
483 *19*, 1-22. 10.1146/annurev.cellbio.19.111301.143037.
- 484 Rajagopal, J., and Stanger B.Z. (2016). Plasticity in the Adult: How Should the  
485 Waddington Diagram Be Applied to Regenerating Tissues? *Dev. Cell* 36, 133-137.  
486 10.1016/j.devcel.2015.12.021.
- 487 Rakic, P. (2002). Adult neurogenesis in mammals: an identity crisis. *J. Neurosci.* 22,  
488 614–618. 10.1523/JNEUROSCI.22-03-00614.2002.
- 489 Reid, A., and Tursun, B. (2018). Transdifferentiation: do transition states lie on the path  
490 of development? *Curr. Opin. Syst. Biol.* 11, 18-23. 10.1016/j.coisb.2018.07.004.
- 491 Slack, J.M. (2007). Metaplasia and transdifferentiation: from pure biology to the clinic.  
492 *Nat Rev Mol. Cell Biol.* 8, 369-78. 10.1038/nrm2146.
- 493 Sorrells, S.F., Paredes, M.F., Zhang, Z., Kang, G., Pastor-Alonso, O., Biagiotti, S.,  
494 Page, C.E., Sandoval, K., Knox, A., Connolly, A., et al. (2021). Positive controls in  
495 adults and children support that very few, if any, new neurons are born in the adult  
496 human hippocampus. *J. Neurosci.* 41, 2554–2565. 10.1523/JNEUROSCI.0676-20.2020.
- 497 Suon, S., Jin, H., Donaldson, A.E., Caterson, E.J., Tuan, R.S., Deschenes, G.,  
498 Marshall, C., and Iacovitti, L. (2004). Transient differentiation of adult human bone  
499 marrow cells into neuron-like cells in culture: development of morphological and

500 biochemical traits is mediated by different molecular mechanisms. *Stem Cells Dev.* *13*,  
501 625-635. 10.1089/scd.2004.13.625.

502 Wittmann, M., Queisser, G., Eder, A., Wiegert, J.S., Bengtson, C.P., Hellwig, A.,  
503 Wittum, G., and Bading, H. (2009). Synaptic activity induces dramatic changes in the  
504 geometry of the cell nucleus: interplay between nuclear structure, histone H3  
505 phosphorylation, and nuclear calcium signaling. *J. Neurosci.* *29*, 14687–14700.  
506 10.1523/JNEUROSCI.1160-09.2009.

507 Woodbury, D., Reynolds, K., and Black, I.B. (2002). Adult bone marrow stromal stem  
508 cells express germline, ectodermal, endodermal, and mesodermal genes prior to  
509 neurogenesis. *J. Neurosci. Res* *69*, 908-917. 10.1002/jnr.10365.

510

## 511 **Figure legends**

512 **Figure 1. Morphological changes in hBM-MSC cultures during neural**  
513 **transdifferentiation.** Time-lapse imaging revealed that, following neural induction,  
514 hBM-MSCs rapidly reshaped from a flat to a spherical morphology. Subsequently, we  
515 observed that hBM-MSC-derived round cells can preserve their spherical shape for  
516 several days (green arrows), change to that of neural-like cells through active neurite  
517 extension (red arrows) or revert back to the mesenchymal morphology (yellow arrows).  
518 Scale bar: 25  $\mu\text{m}$ .

519 **Figure 2. Morphological changes in dedifferentiated hBM-MSC.** Time-lapse  
520 imaging showed the appearance (arrows), movement and disappearance (asterisk) of  
521 cellular protrusion from the surface of hBM-MSC-derived round cells. Scale bar: 25  
522  $\mu\text{m}$ .

523 **Figure 3. Neuronal polarisation of dedifferentiated hBM-MSCs.** Time-lapse  
524 imaging revealed the growth of new neurites from the body of round cells that which  
525 gradually adopted a complex morphology, acquiring dendrite-like (green arrows) and  
526 axon-like domains (yellow arrows). There was no observation of any transient cellular  
527 protrusion as hBM-MSC-derived round cells gradually acquired a neural-like  
528 morphology. Scale bar: 25  $\mu\text{m}$ .

529 **Figure 4. hBMSCs can repeatedly switch lineages.** Time-lapse imaging showed that  
530 hBM-MSCs can also rapidly switch lineages without cell division. Mesenchymal  
531 morphology (green arrows); switching lineages (white arrows); dedifferentiation  
532 morphology (red arrows); neural-like morphology (yellow arrows). Scale bar: 25  $\mu\text{m}$ .

533 **Figure 5. Nucleus remodelling occurs during neural transdifferentiation from**  
534 **hBM-MSCs.** Time-lapse microscopy evidenced that nuclear remodelling occurred  
535 during neural transdifferentiation from histone H2B-GFP-expressing hBM-MSCs.  
536 Nuclei from hBM-MSC-derived round cells moved within the cell, adopting different  
537 morphologies, including finger shaped (red arrows) and kidney shaped (white arrows),  
538 and even forming lobed nuclei connected by nucleoplasmic bridges (yellow arrows).  
539 Scale bar: 25  $\mu\text{m}$ .

540 **Figure 6. Nuclear movement generated cellular protrusions that appeared and**  
541 **disappeared from the surface of hBM-MSC-derived round cells.** Time-lapse  
542 microscopy revealed that the cell nucleus of histone H2B-GFP-expressing hBM-MSCs  
543 acquired a finger-like shape and moved within the cell, generating the transient cellular  
544 protrusions (arrows) on the surface of the hBM-MSC-derived round cells. Scale bar: 25  
545  $\mu\text{m}$ . PhC: Phase-contrast photomicrographs.

546 **Figure 7. Binucleated hBM-MSCs can form with independence of any cell fusion**  
547 **events.** Time-lapse microscopy revealed that the nuclei from histone H2B-GFP-  
548 expressing, dedifferentiated hBM-MSCs can move within the cell, forming lobed nuclei  
549 connected by nucleoplasmic bridges. The movement of the lobed nuclei also generated  
550 cellular transient protrusions from the surface of hBM-MSC-derived round cells. Scale  
551 bar: 25  $\mu$ m. PhC: Phase-contrast photomicrographs.

## 552 **Supplementary figures**

553 **Figure S1. Dedifferentiated hBM-MSC nuclei can switch their morphology and**  
554 **positioning.** Time-lapse microscopy highlighted that the cell nucleus from histone  
555 H2B-GFP-expressing hBM-MSCs can switch its morphology while it is moving. Here,  
556 the nucleus acquired a finger-like shape before reorienting toward a peripheral position  
557 within the cell and acquiring a kidney-like shape. Subsequently, the cell nucleus began  
558 to move rapidly around the cell. Scale bar: 25  $\mu$ m.

559 **Figure S2. Mononucleated dedifferentiated hBM-MSCs position their nucleus at**  
560 **the front of the cell during migration. A)** Time-lapse microscopy showed that kidney-  
561 shaped, histone H2B-GFP-expressing, dedifferentiated hBM-MSCs cells positioned  
562 their nucleus at the front of the cell during migration. **B)** In addition, finger-shaped,  
563 histone H2B-GFP-expressing, dedifferentiated hBM-MSCs also positioned their nuclei  
564 at the front of the cell during migration. Scale bar: 25  $\mu$ m.

565 **Figure S3. Dedifferentiated hBM-MSC with lobed nuclei position their nucleus at**  
566 **the front of the cell during migration. A)** Time-lapse microscopy showed that histone  
567 H2B-GFP-expressing, dedifferentiated hBM-MSCs with lobed nuclei positioned their  
568 nucleus at the front of the cell during migration. **B)** Furthermore, histone H2B-GFP-



569 expressing, dedifferentiated hBM-MSCs with lobed nuclei positioned their largest lobe  
570 at the front of the cell during migration. Scale bar: 25  $\mu$ m.

571 **Figure S4. Nuclear morphology and positioning during neuronal polarisation of**  
572 **dedifferentiated hBM-MSCs.** Time-lapse microscopy did not reveal any changes in  
573 nuclear positioning or lobed nuclei formation as histone H2B-GFP-expressing, hBM-  
574 MSC-derived round cells gradually acquired a neural-like morphology (asterisks). Scale  
575 bar: 25  $\mu$ m.

576 **Figure S5. Nuclear morphology when hBM-MSC-derived round cells**  
577 **redifferentiate back to the mesenchymal fate. A)** Time-lapse microscopy revealed  
578 that when histone H2B-GFP-expressing, dedifferentiated hBM-MSCs with a single  
579 nucleus reverted back to the mesenchymal morphology (asterisk), the nuclei gradually  
580 reverted back to their original ellipsoid shape. **B)** By contrast, when histone H2B-GFP-  
581 expressing, dedifferentiated hBM-MSCs with lobed nuclei reverted back to the  
582 mesenchymal morphology (asterisk), the lobed nuclei were maintained for hours. Scale  
583 bar: 25  $\mu$ m.

584 **Figure S6. hBM-MSCs exhibit unusual nuclear structures and chromatin-**  
585 **containing bodies in the cellular cytoplasm during neural transdifferentiation. A)**  
586 Confocal microscopy analysis showed that histone H2B-GFP-expressing hBM-MSCs  
587 with a finger-shaped nucleus can also present chromatin-containing bodies in the  
588 cellular cytoplasm. **B)** Histone H2B-GFP-expressing hBM-MSCs a kidney-shaped  
589 nucleus can also exhibit chromatin-containing bodies in the cellular cytoplasm. **C)**  
590 Histone H2B-GFP-expressing hBM-MSCs with a lobed nucleus connected by  
591 nucleoplasmic bridges can also exhibit chromatin-containing bodies in the cellular  
592 cytoplasm. **D)** We noted that histone H2B-GFP-expressing hBM-MSCs with chromatin-

593 containing bodies were connected to the main body of the nucleus by thin strands of  
594 nuclear material. **E)** Furthermore, histone H2B-GFP-expressing hBM-MSCs with  
595 chromatin-containing bodies moved away from or toward the main nuclei. **F)** Histone  
596 H2B-GFP-expressing hBM-MSCs with two lobed nuclei unconnected by any  
597 nucleoplasmic bridges with chromatin-containing bodies in the cellular cytoplasm were  
598 also observed. Scale bar: 10  $\mu\text{m}$ .

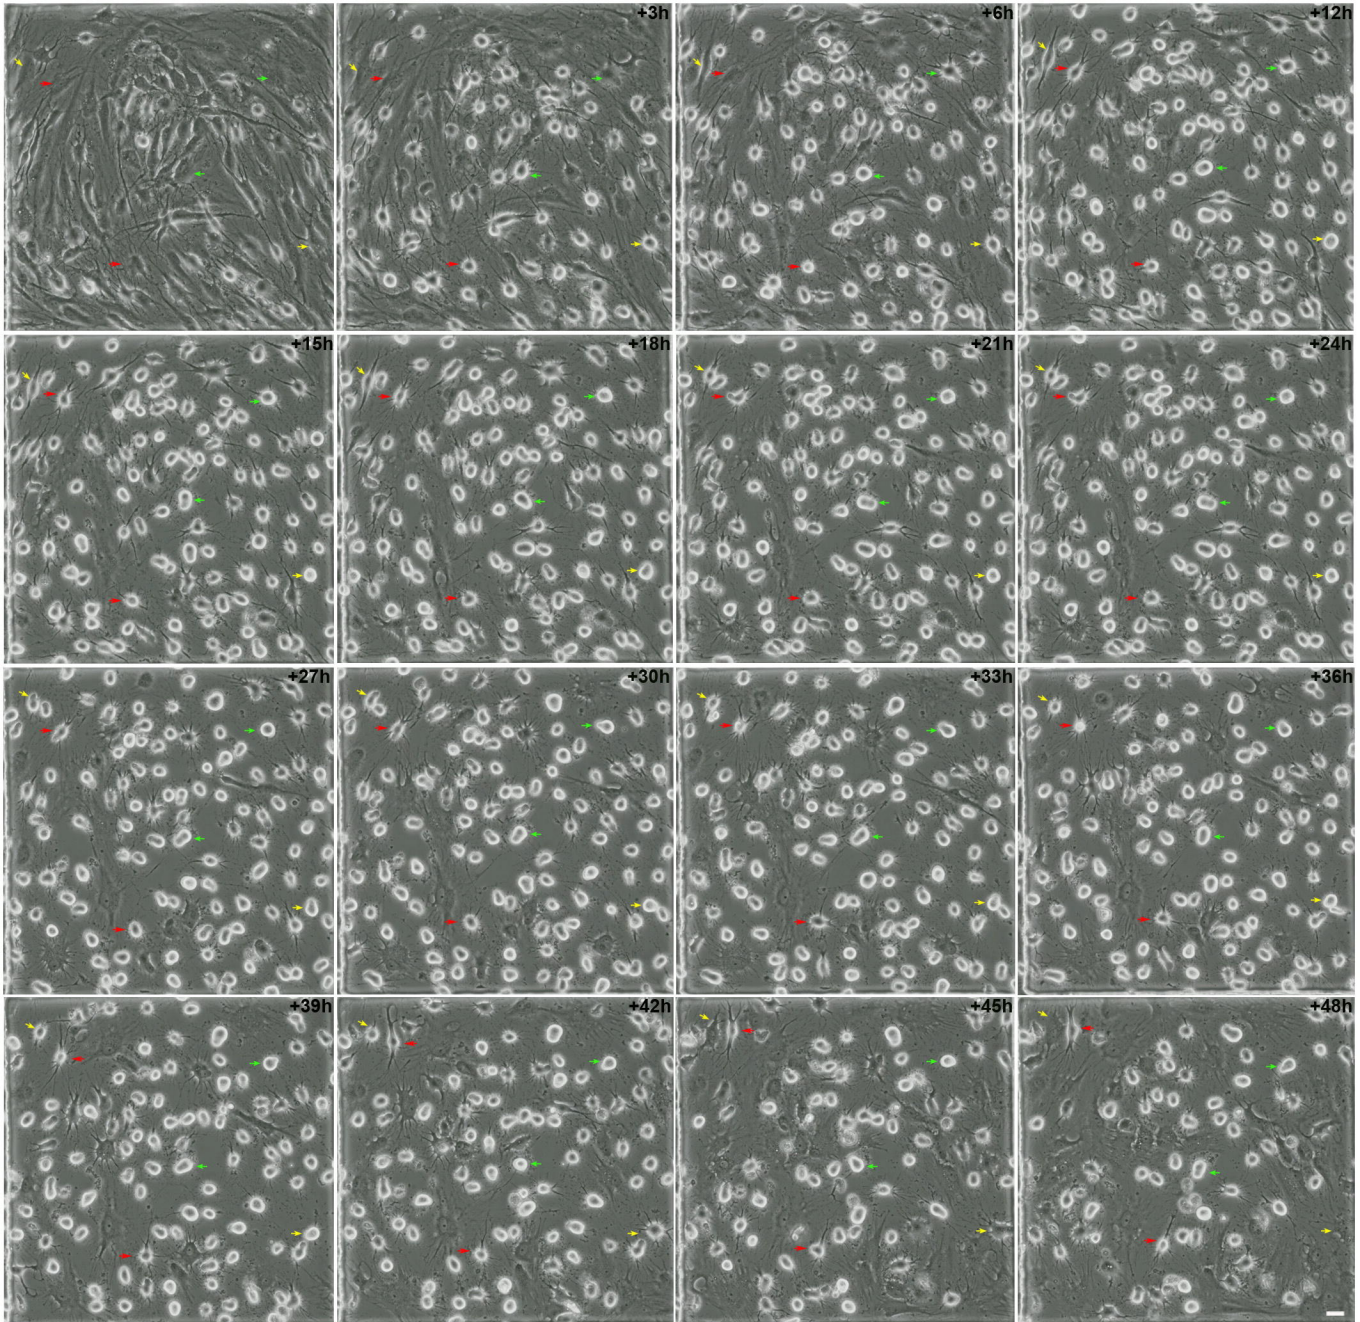

Figure 1

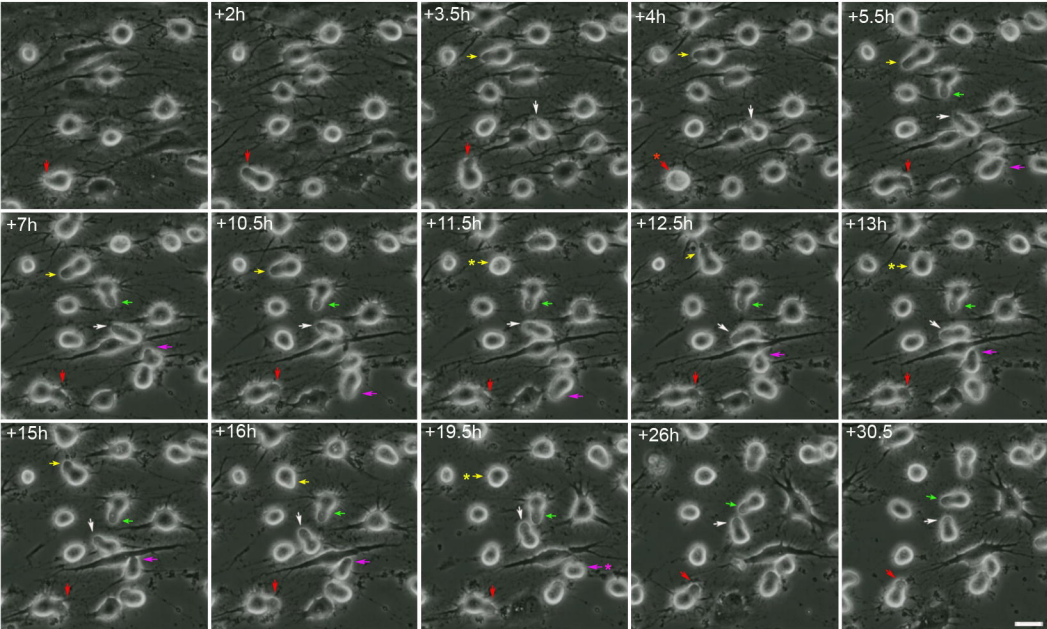

Figure 2

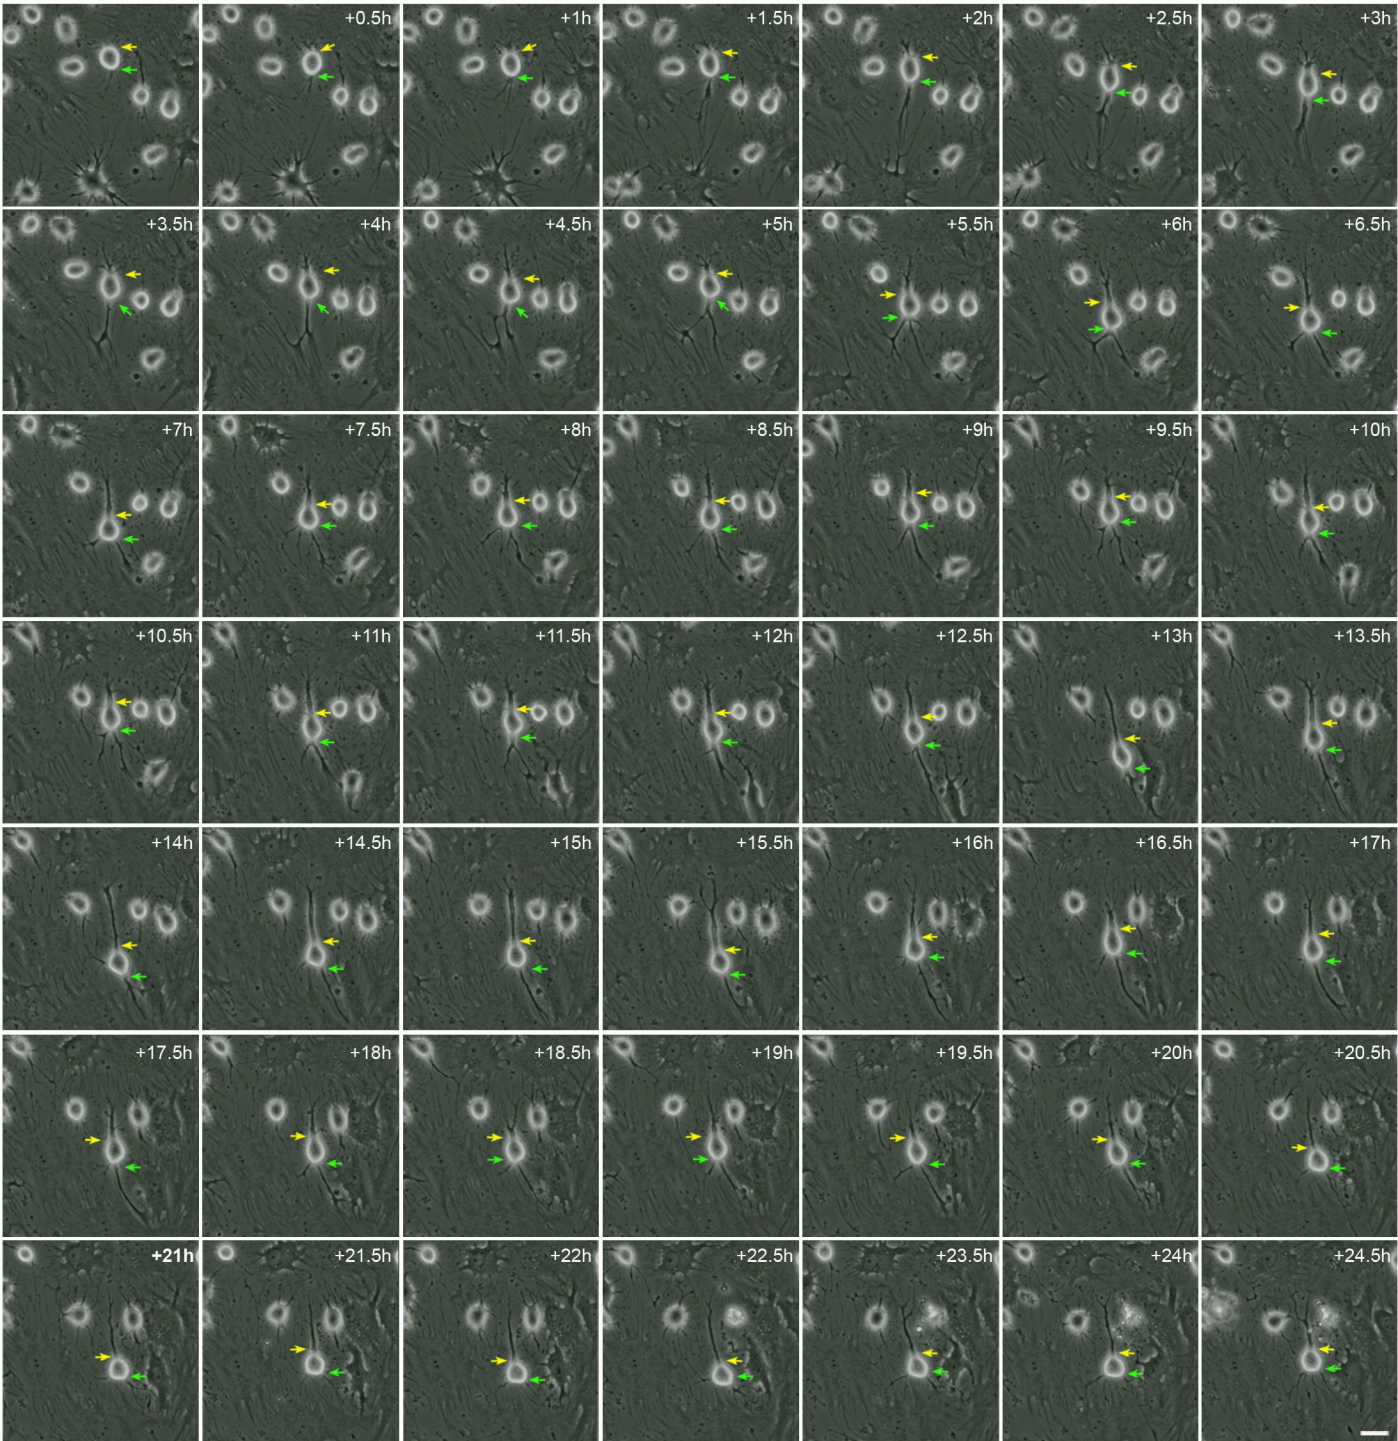

Figure 3

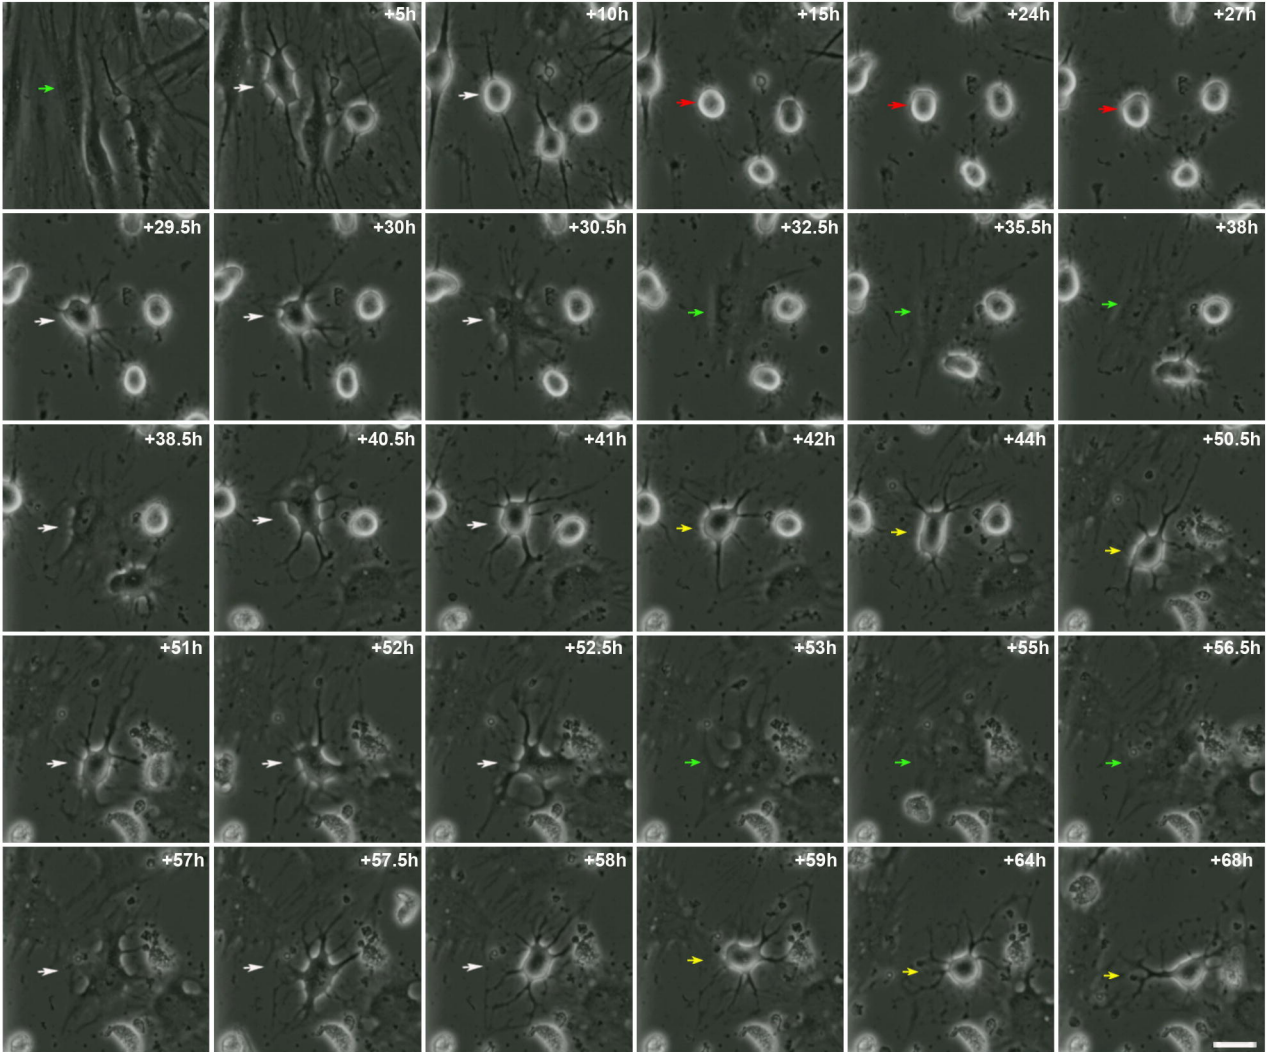

Figure 4

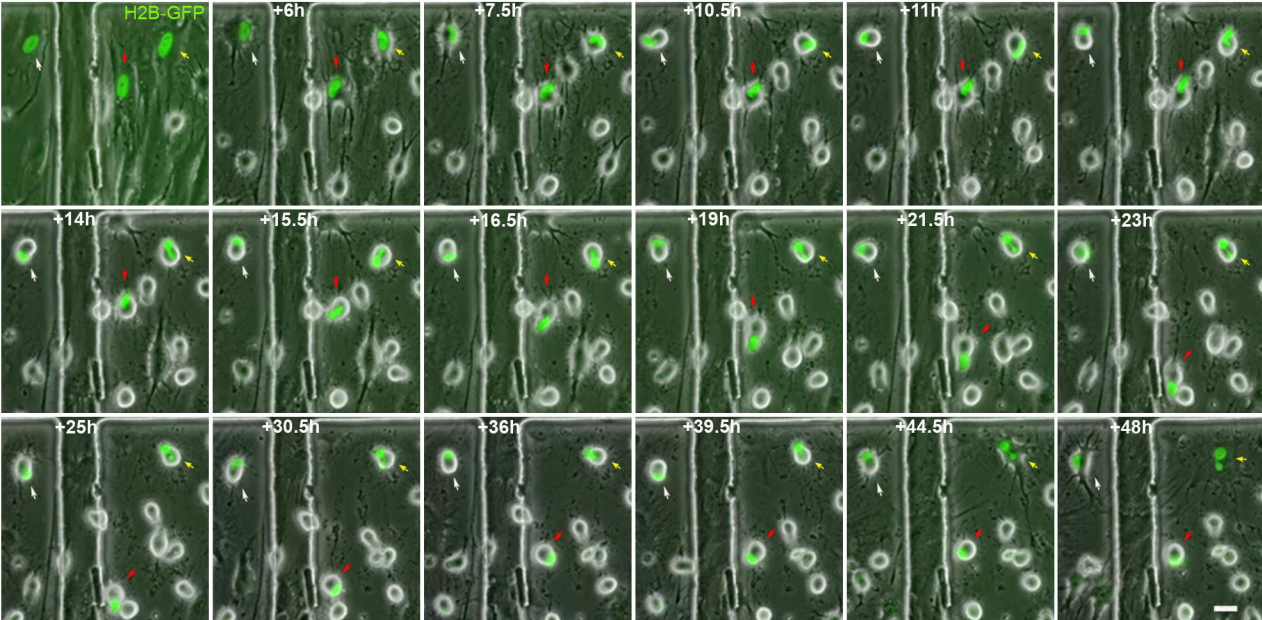

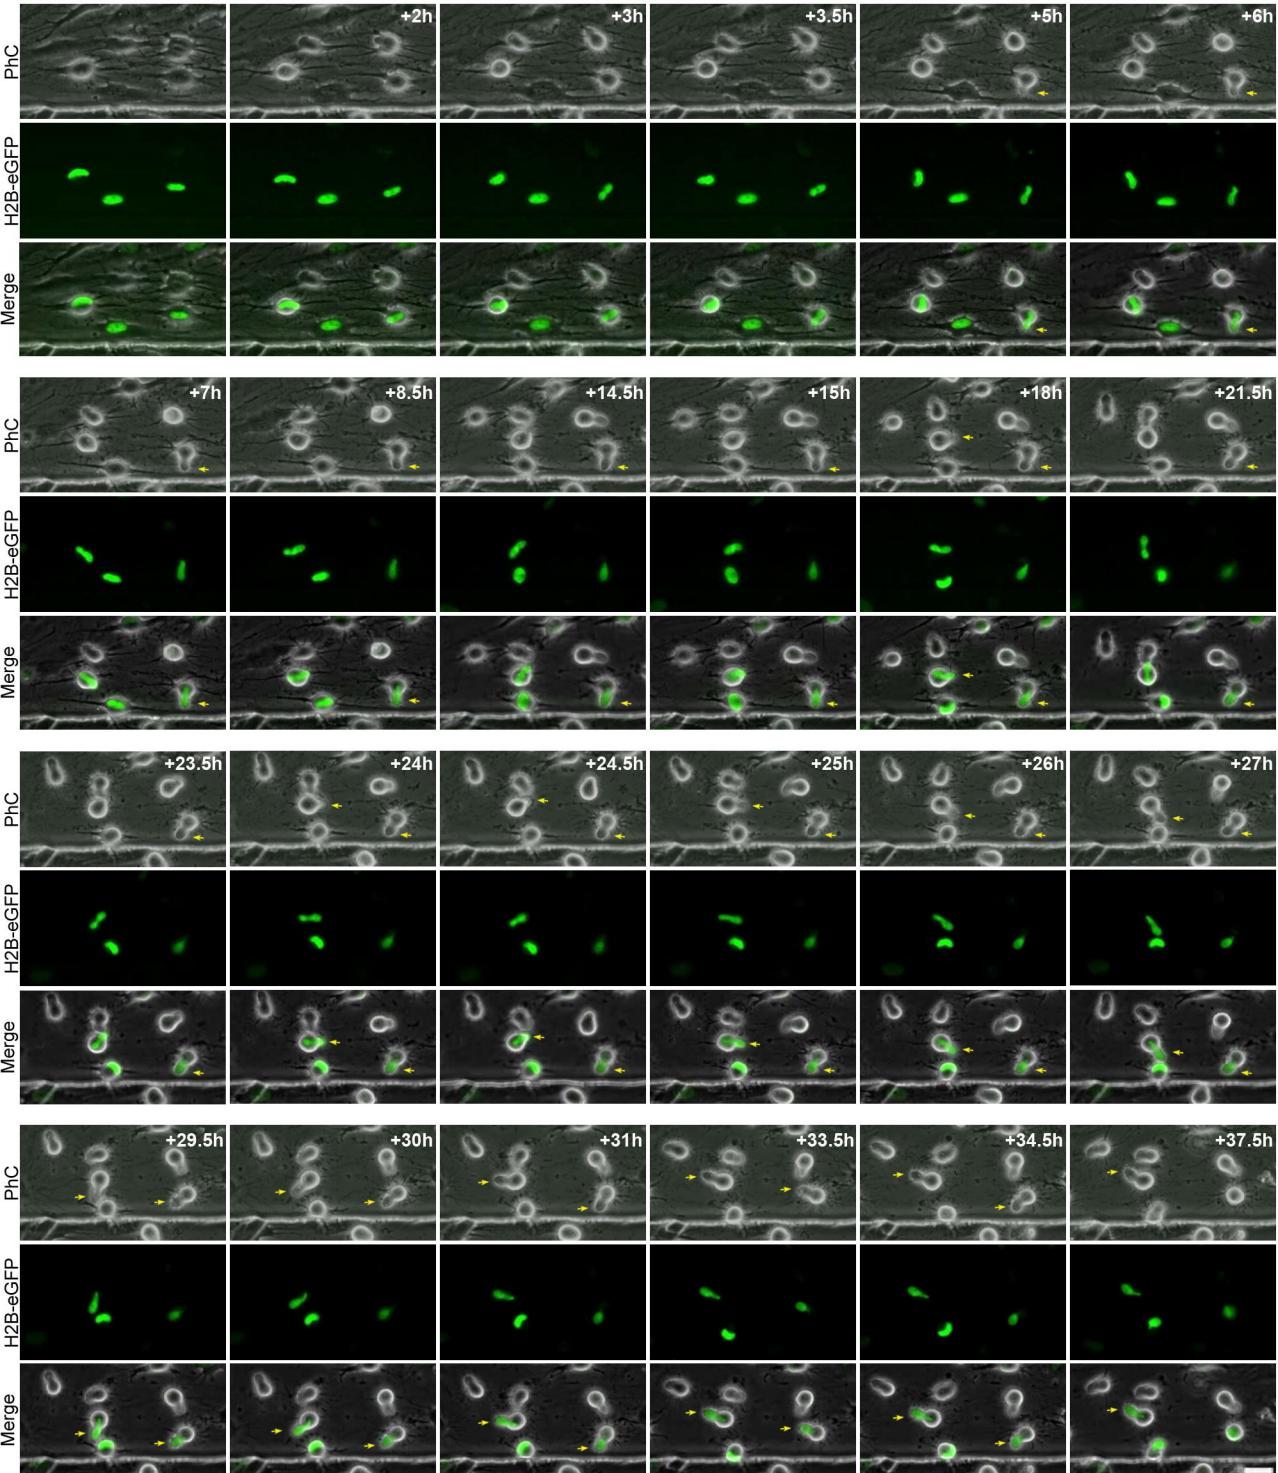

Figure 6



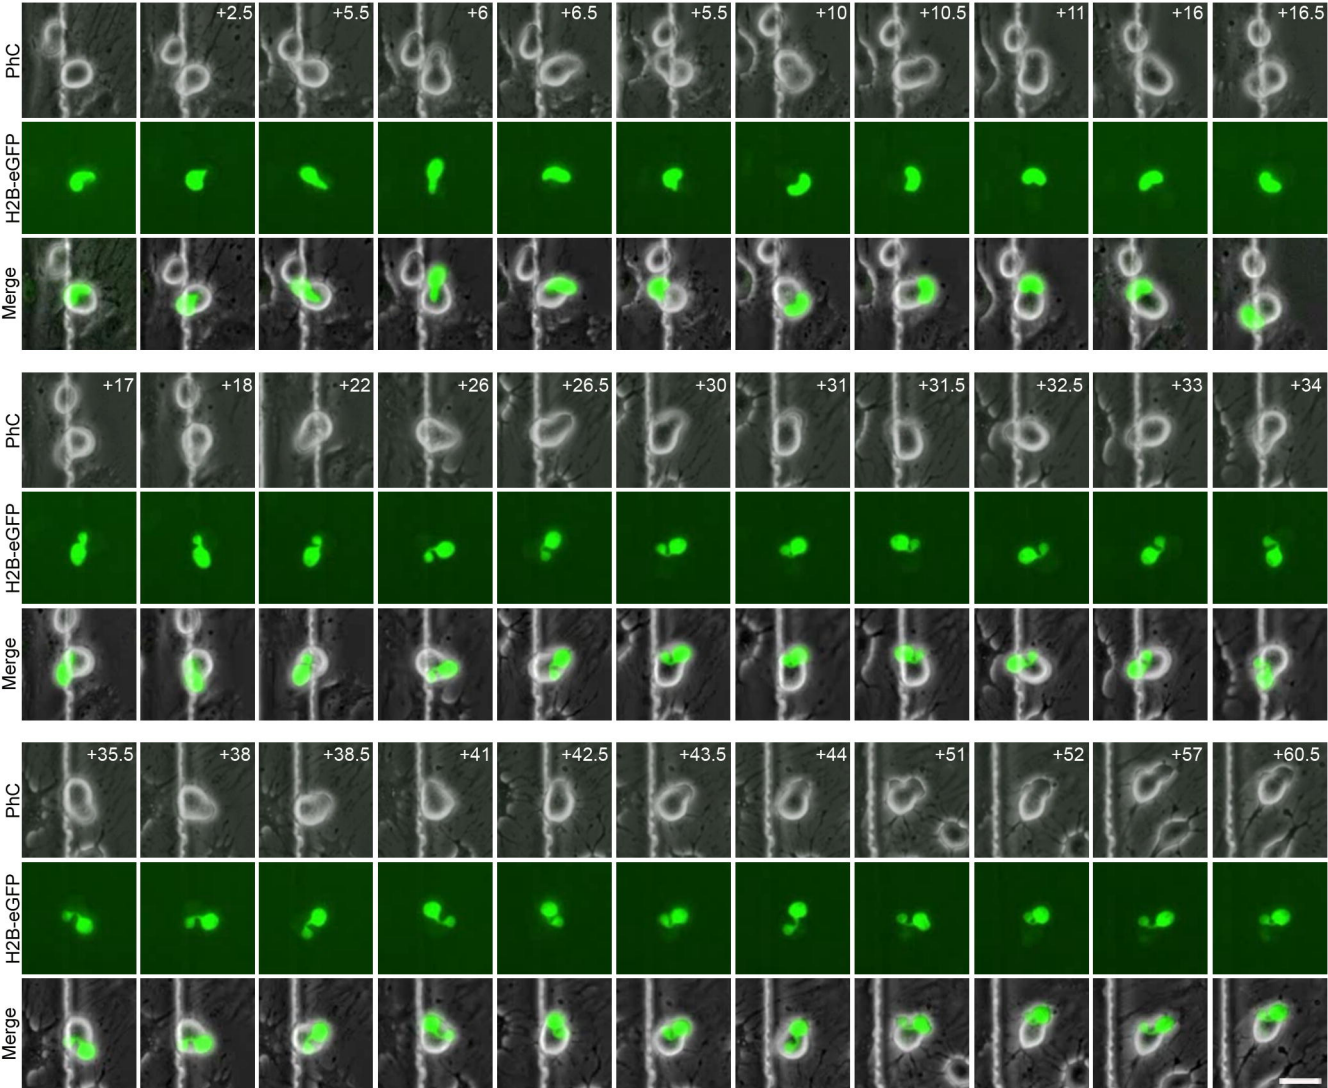

Figure 7

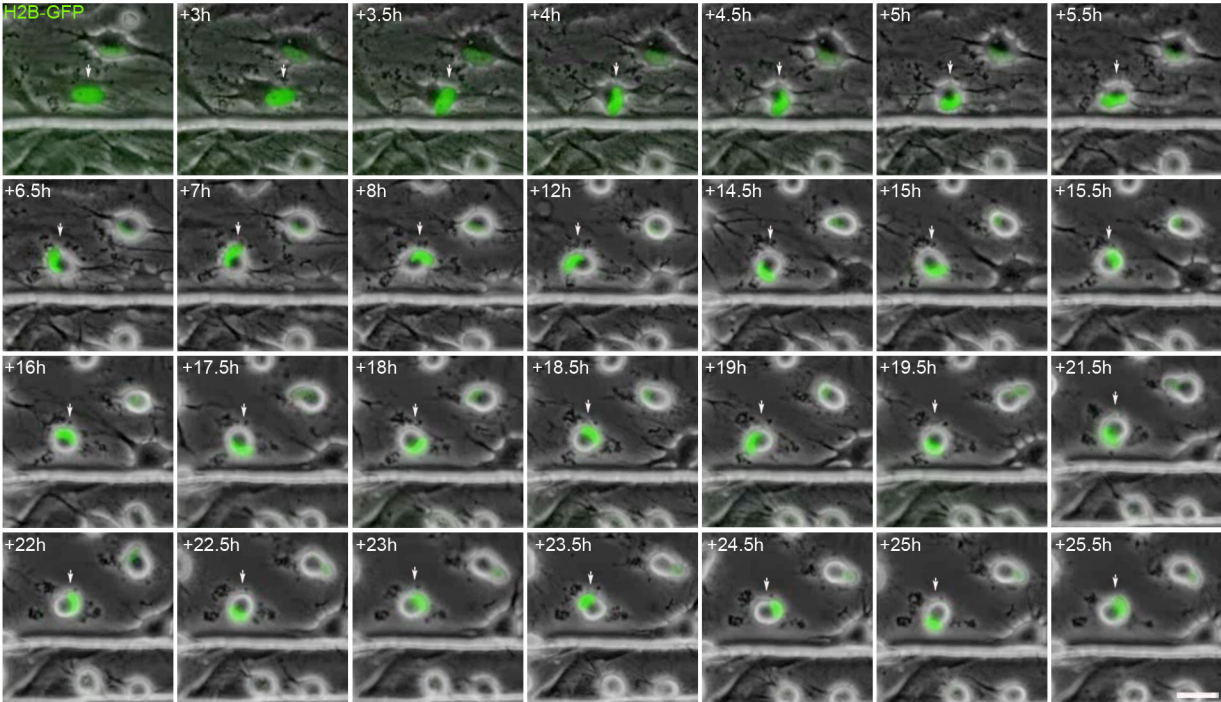

Figure S1

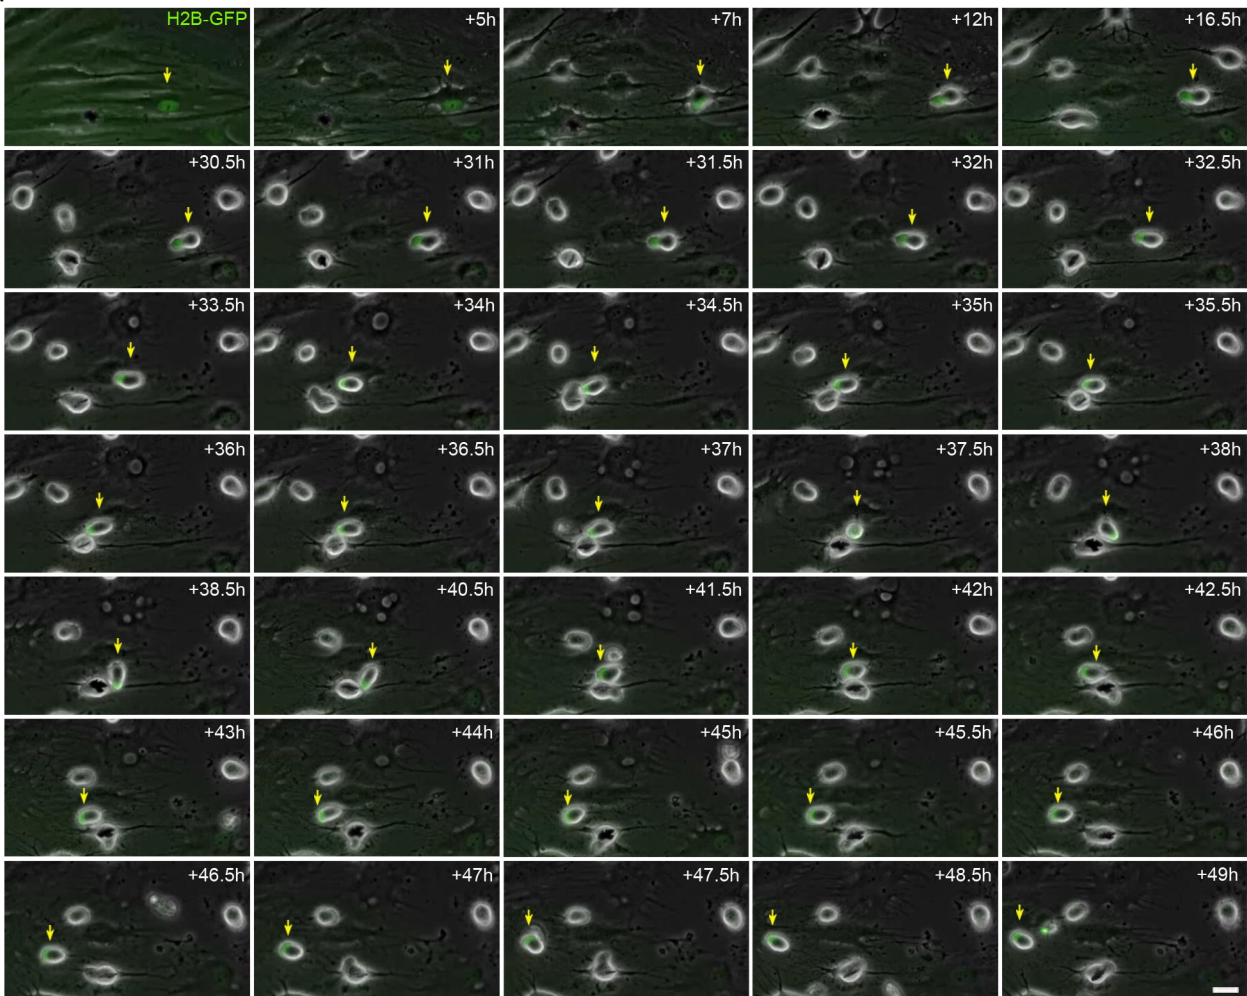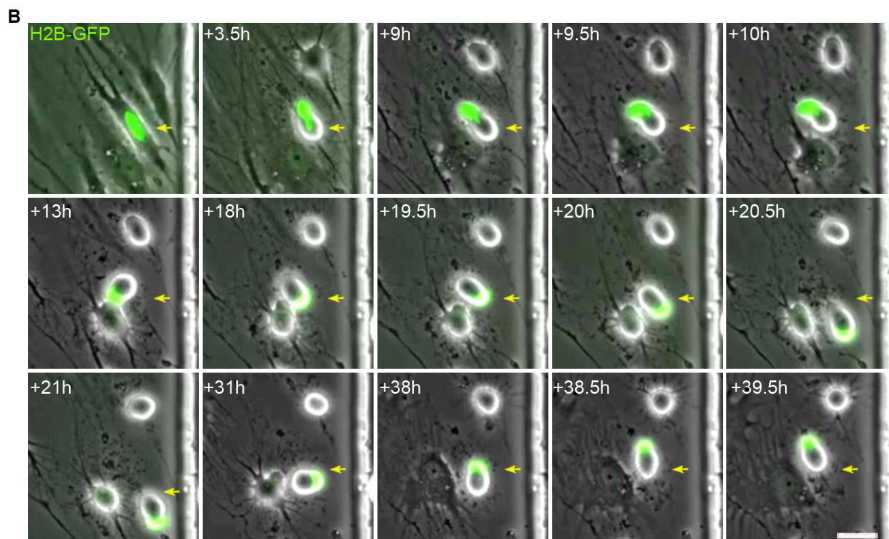

Figure S2

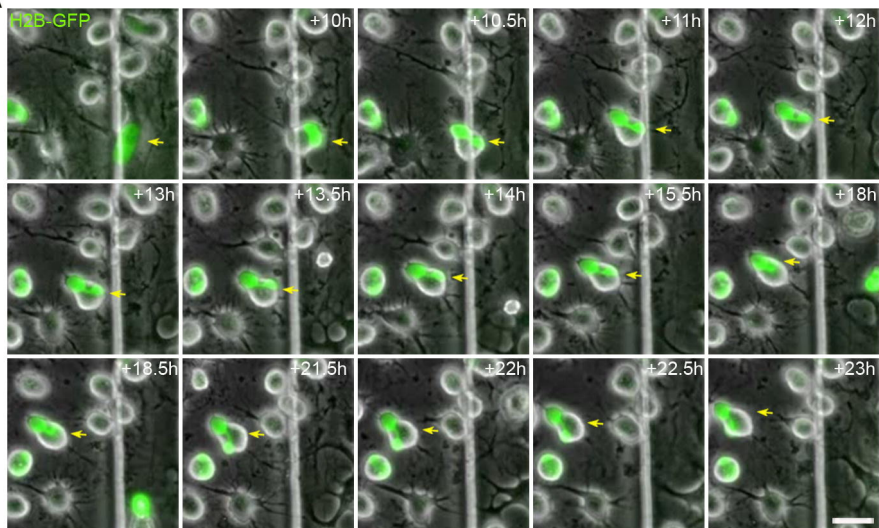

**B**

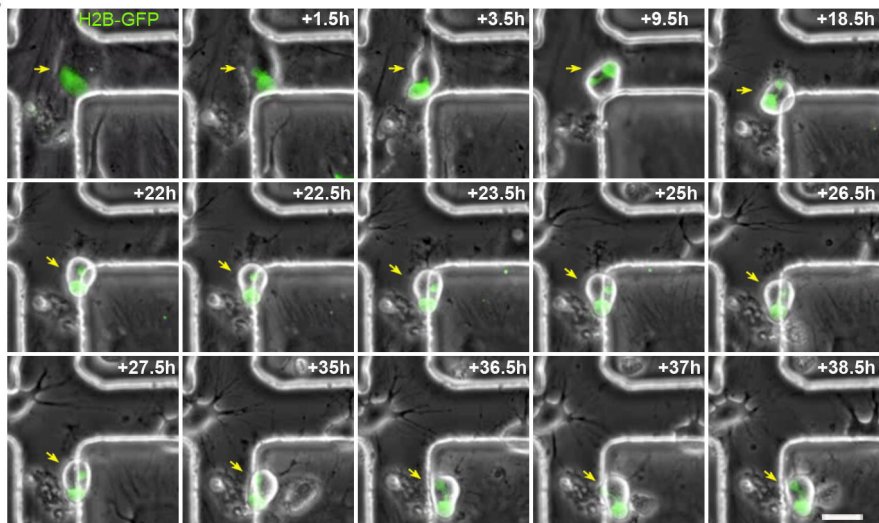

Figure S3

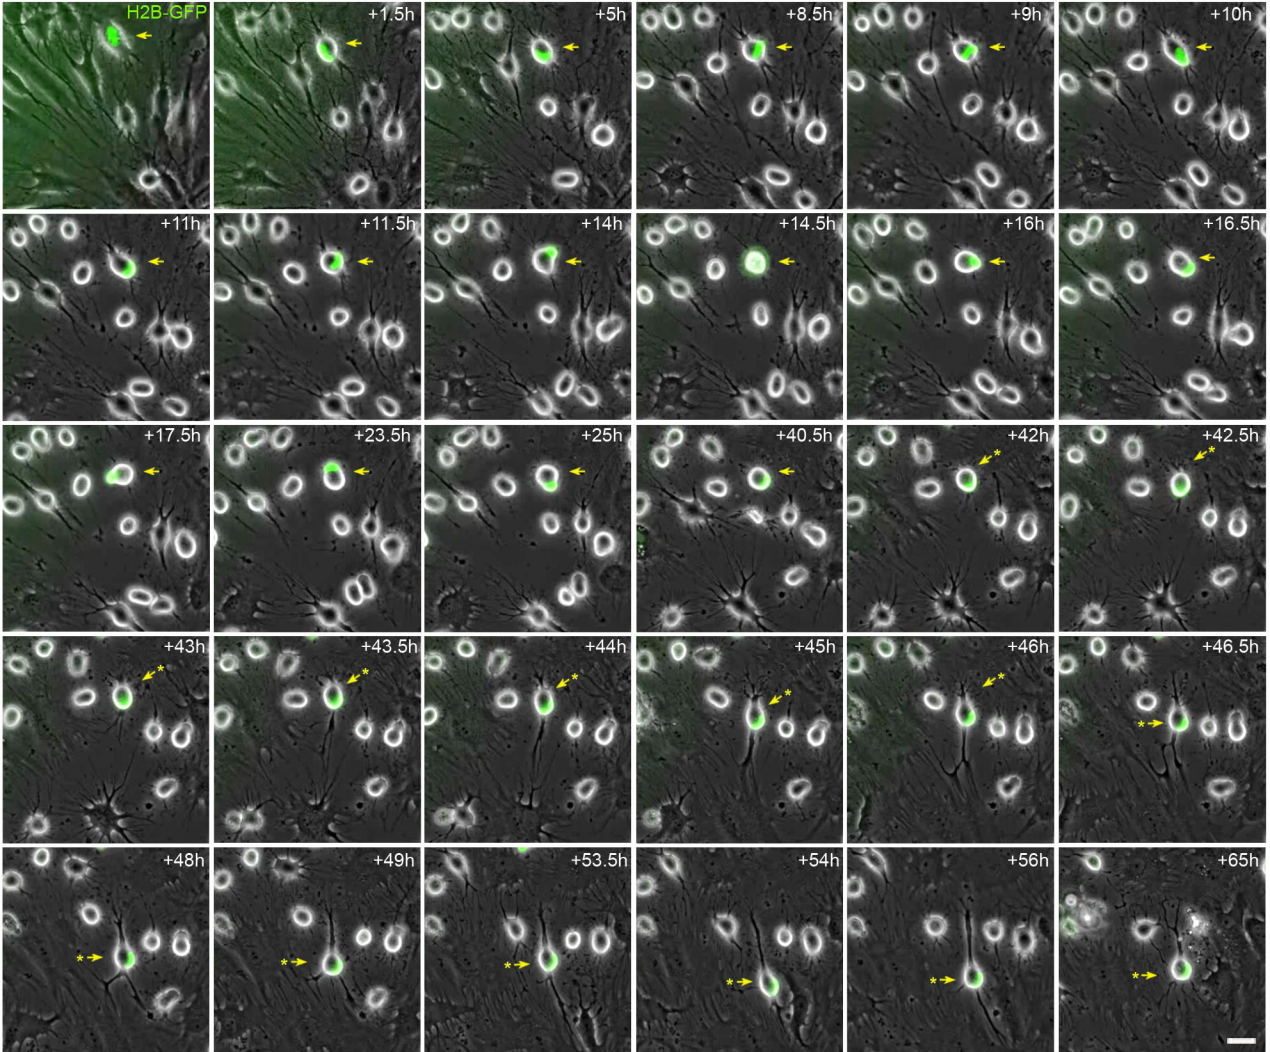

Figure S4

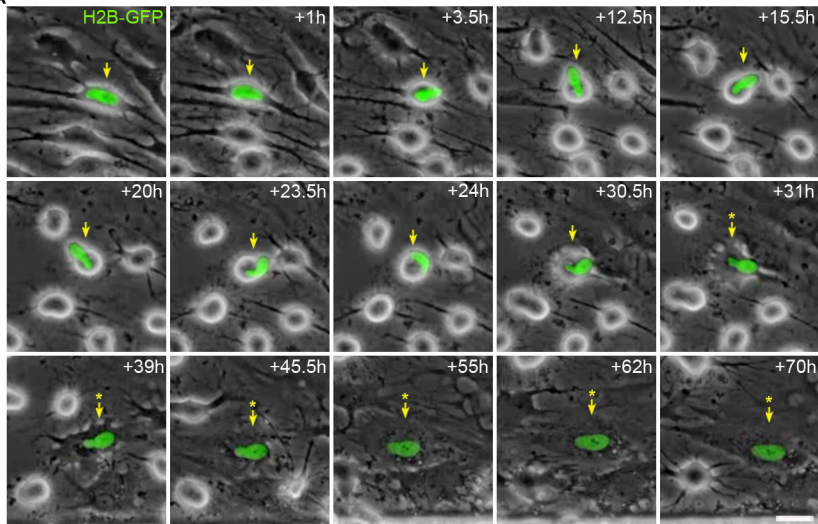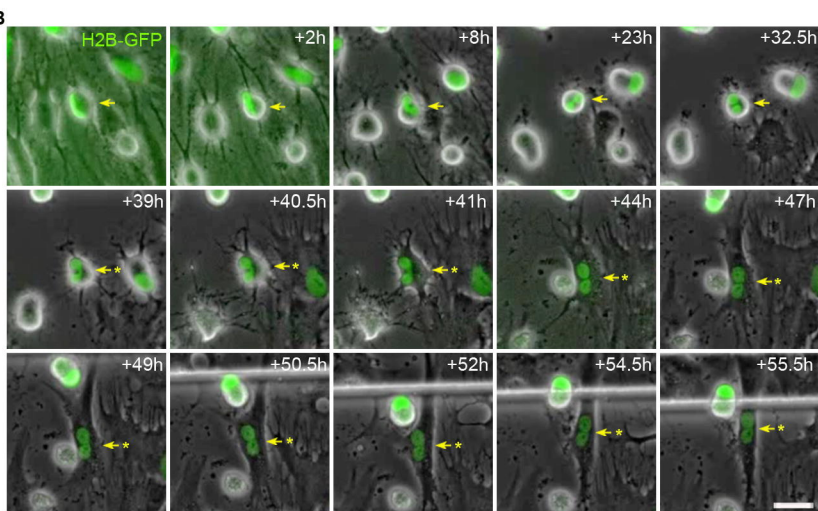

Figure S5

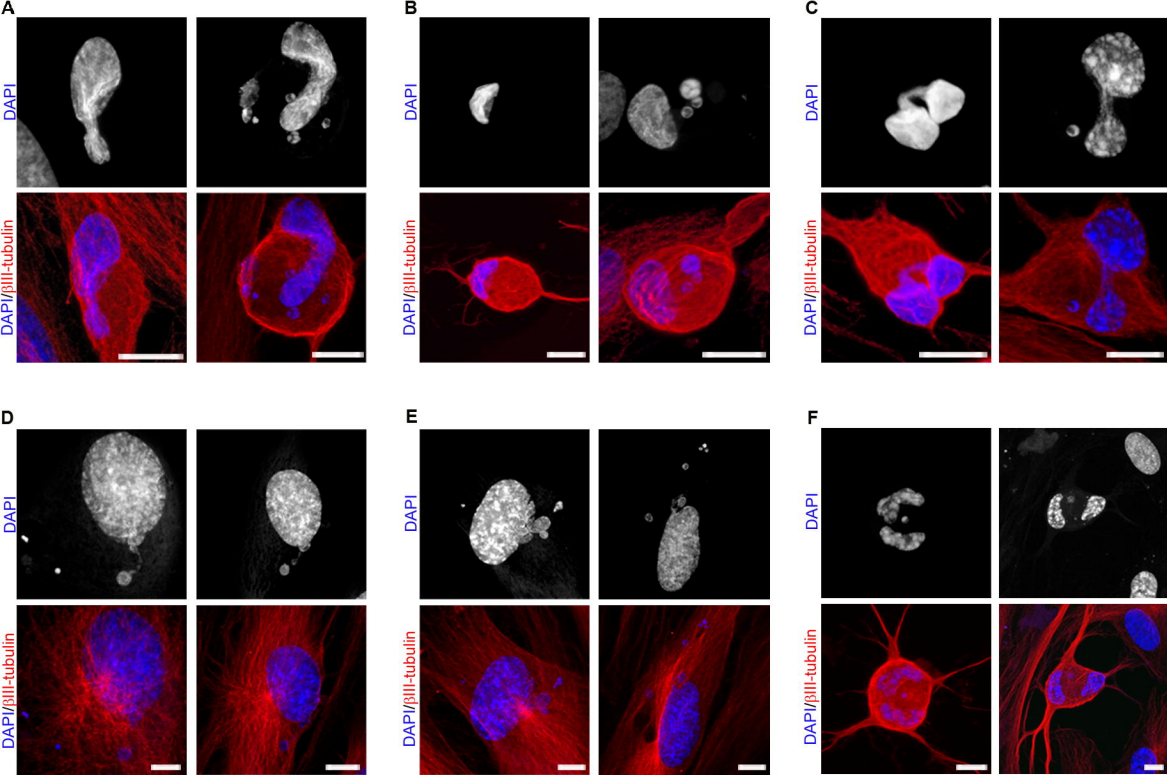

Figure S6
